# Supplementary material
Source: publisher figshare collection journal article supplement (https://acs.figshare.com/ndownloader/files/5339350)
Supplement: Supplementary file 1 [file 5339350]

 
data_Pd-complex
 
_audit_creation_method            SHELXL-97 
_chemical_name_systematic 
; 
 ? 
; 
_chemical_name_common             ? 
_chemical_melting_point           ? 
_chemical_formula_moiety 'C48 H44 F6 O10 P2 Pd S2, 3(C D Cl3)'
_chemical_formula_sum 'C51 H44 Cl9 D3 F6 O10 P2 Pd S2'
_chemical_formula_weight          1488.44
_chemical_absolute_configuration 'rmad'
 
loop_ 
 _atom_type_symbol 
 _atom_type_description 
 _atom_type_scat_dispersion_real 
 _atom_type_scat_dispersion_imag 
 _atom_type_scat_source 
 'C'  'C'   0.0033   0.0016 
 'International Tables Vol C Tables 4.2.6.8 and 6.1.1.4' 
 'H'  'H'   0.0000   0.0000 
 'International Tables Vol C Tables 4.2.6.8 and 6.1.1.4' 
 'D'  'D'   0.0000   0.0000 
 'International Tables Vol C Tables 4.2.6.8 and 6.1.1.4' 
 'Cl'  'Cl'   0.1484   0.1585 
 'International Tables Vol C Tables 4.2.6.8 and 6.1.1.4' 
 'F'  'F'   0.0171   0.0103 
 'International Tables Vol C Tables 4.2.6.8 and 6.1.1.4' 
 'O'  'O'   0.0106   0.0060 
 'International Tables Vol C Tables 4.2.6.8 and 6.1.1.4' 
 'P'  'P'   0.1023   0.0942 
 'International Tables Vol C Tables 4.2.6.8 and 6.1.1.4' 
 'Pd'  'Pd'  -0.9988   1.0072 
 'International Tables Vol C Tables 4.2.6.8 and 6.1.1.4' 
 'S'  'S'   0.1246   0.1234 
 'International Tables Vol C Tables 4.2.6.8 and 6.1.1.4' 
 
_symmetry_cell_setting         'orthorhombic'
_symmetry_space_group_name_H-M  'P 21 21 21'
_symmetry_space_group_name_Hall 'P 2ac 2ab'
 
loop_ 
 _symmetry_equiv_pos_as_xyz 
 'x, y, z' 
 'x+1/2, -y+1/2, -z' 
 '-x, y+1/2, -z+1/2' 
 '-x+1/2, -y, z+1/2' 
 
_cell_length_a                    12.0672(14) 
_cell_length_b                    15.2049(18) 
_cell_length_c                    33.606(4) 
_cell_angle_alpha                 90
_cell_angle_beta                  90
_cell_angle_gamma                 90
_cell_volume                      6166.0(13) 
_cell_formula_units_Z             4 
_cell_measurement_temperature     90
_cell_measurement_reflns_used     18889
_cell_measurement_theta_min       1.7930
_cell_measurement_theta_max       31.4203
 
_exptl_crystal_description       'needle'
_exptl_crystal_colour            'yellow'
_exptl_crystal_size_max           0.57 
_exptl_crystal_size_mid           0.08 
_exptl_crystal_size_min           0.05 
_exptl_crystal_density_meas       ? 
_exptl_crystal_density_diffrn     1.603
_exptl_crystal_density_method     'not measured' 
_exptl_crystal_F_000              2992 
_exptl_absorpt_coefficient_mu     0.882 
_exptl_absorpt_correction_type   'Numerical'
_exptl_absorpt_correction_T_max  0.9474
_exptl_absorpt_correction_T_min  0.7089
_exptl_absorpt_process_details
;
Higashi, T. (1999). Numabs-Numerical Absorption Correction, 
Rigaku Corporation, Tokyo, Japan.
;
 
_exptl_special_details 
; 
 ? 
; 
 
_diffrn_ambient_temperature       90
_diffrn_radiation_wavelength      0.71073 
_diffrn_radiation_type            MoK\a 
_diffrn_radiation_source          'fine-focus rotating anode' 
_diffrn_radiation_monochromator   'confocal'
_diffrn_measurement_device_type   'Rigaku AFC-8 with Saturn70 CCD'
_diffrn_measurement_method        '\w-scan'
_diffrn_detector_area_resol_mean  28.5714
_diffrn_standards_number          0
_diffrn_standards_interval_count  ? 
_diffrn_standards_interval_time   ? 
_diffrn_standards_decay_%         ? 
_diffrn_reflns_number             116652 
_diffrn_reflns_av_R_equivalents   0.0394 
_diffrn_reflns_av_sigmaI/netI     0.0269 
_diffrn_reflns_limit_h_min        -16 
_diffrn_reflns_limit_h_max        16 
_diffrn_reflns_limit_k_min        -21 
_diffrn_reflns_limit_k_max        21 
_diffrn_reflns_limit_l_min        -47 
_diffrn_reflns_limit_l_max        47 
_diffrn_reflns_theta_min          1.79 
_diffrn_reflns_theta_max          30.04 
_reflns_number_total              18030 
_reflns_number_gt                 17529 
_reflns_threshold_expression      I>2\s(I) 
_diffrn_measurement_details
;
scan:
        Number of images: 360
                   Slice: -60.0000 - 120.0000
             Image width: 0.5000
                Exp time: 16.0000
           Rotation axis: Omega
                   Omega: 0.0000
                     Chi: 0.0000
                     Phi: 0.0000
                     XTD: 59.8505
                  2theta: 30.0792
scan:
        Number of images: 360
                   Slice: -60.0000 - 120.0000
             Image width: 0.5000
                Exp time: 16.0000
           Rotation axis: Omega
                   Omega: 0.0000
                     Chi: 50.0000
                     Phi: 45.0000
                     XTD: 59.8505
                  2theta: 30.0792
scan:
        Number of images: 360
                   Slice: -60.0000 - 120.0000
             Image width: 0.5000
                Exp time: 16.0000
           Rotation axis: Omega
                   Omega: 0.0000
                     Chi: 50.0000
                     Phi: 90.0000
                     XTD: 59.8505
                  2theta: 30.0792
scan:
        Number of images: 360
                   Slice: -60.0000 - 120.0000
             Image width: 0.5000
                Exp time: 16.0000
           Rotation axis: Omega
                   Omega: 0.0000
                     Chi: 50.0000
                     Phi: 180.0000
                     XTD: 59.8505
                  2theta: 30.0792
scan:
        Number of images: 360
                   Slice: -60.0000 - 120.0000
             Image width: 0.5000
                Exp time: 16.0000
           Rotation axis: Omega
                   Omega: 0.0000
                     Chi: 50.0000
                     Phi: 270.0000
                     XTD: 59.8505
                  2theta: 30.0792

;
_diffrn_orient_matrix_UB_11             0.0811
_diffrn_orient_matrix_UB_12             0.0106
_diffrn_orient_matrix_UB_13             0.0130
_diffrn_orient_matrix_UB_21             0.0114
_diffrn_orient_matrix_UB_22             -0.0613
_diffrn_orient_matrix_UB_23             -0.0209
_diffrn_orient_matrix_UB_31             0.0032
_diffrn_orient_matrix_UB_32             0.0101
_diffrn_orient_matrix_UB_33             -0.0278
_diffrn_orient_matrix_type              'd*Trek'
 
_computing_data_collection 'CrystalClear (Rigaku/MSC Inc., 2005)'
_computing_cell_refinement 'CrystalClear (Rigaku/MSC Inc., 2005)'
_computing_data_reduction  'CrystalClear (Rigaku/MSC Inc., 2005)'
_computing_structure_solution 'SIR-92' 
_computing_structure_refinement   'SHELXL-97 (Sheldrick, 1997)' 
_computing_molecular_graphics  'ORTEP-3 for Windows'
_computing_publication_material  'SHELXL-97 (Sheldrick, 1997)' 
 
_refine_special_details 
; 
 Refinement of F^2^ against ALL reflections.  The weighted R-factor wR and 
 goodness of fit S are based on F^2^, conventional R-factors R are based 
 on F, with F set to zero for negative F^2^. The threshold expression of 
 F^2^ > 2\s(F^2^) is used only for calculating R-factors(gt) etc. and is 
 not relevant to the choice of reflections for refinement.  R-factors based 
 on F^2^ are statistically about twice as large as those based on F, and R- 
 factors based on ALL data will be even larger. 
; 
 
_refine_ls_structure_factor_coef  Fsqd  
_refine_ls_matrix_type            full 
_refine_ls_weighting_scheme       calc  
_refine_ls_weighting_details 
 'calc w=1/[\s^2^(Fo^2^)+(0.0287P)^2^+5.6535P] where P=(Fo^2^+2Fc^2^)/3' 
_atom_sites_solution_primary      direct 
_atom_sites_solution_secondary    difmap 
_atom_sites_solution_hydrogens    geom 
_refine_ls_hydrogen_treatment     constr
_refine_ls_extinction_method      none 
_refine_ls_extinction_coef        ? 
_refine_ls_abs_structure_details 
 'Flack H D (1983), Acta Cryst. A39, 876-881' 
_refine_ls_abs_structure_Flack    -0.020(13) 
_refine_ls_number_reflns          18030 
_refine_ls_number_parameters      757 
_refine_ls_number_restraints      0 
_refine_ls_R_factor_all           0.0358 
_refine_ls_R_factor_gt            0.0344 
_refine_ls_wR_factor_ref          0.0766 
_refine_ls_wR_factor_gt           0.0757 
_refine_ls_goodness_of_fit_ref    1.071 
_refine_ls_restrained_S_all       1.071 
_refine_ls_shift/su_max           0.001 
_refine_ls_shift/su_mean          0.000 
 
loop_ 
 _atom_site_label 
 _atom_site_type_symbol 
 _atom_site_fract_x 
 _atom_site_fract_y 
 _atom_site_fract_z 
 _atom_site_U_iso_or_equiv 
 _atom_site_adp_type 
 _atom_site_occupancy 
 _atom_site_symmetry_multiplicity 
 _atom_site_calc_flag 
 _atom_site_refinement_flags 
 _atom_site_disorder_assembly 
 _atom_site_disorder_group 
Pd1 Pd 0.002734(13) 0.144159(9) 0.362650(4) 0.01365(3) Uani 1 1 d . . . 
S1 S -0.21174(5) 0.07926(4) 0.416598(19) 0.02539(12) Uani 1 1 d . . . 
S2 S -0.17017(5) 0.21331(4) 0.301148(16) 0.01867(10) Uani 1 1 d . . . 
P1 P 0.10244(5) 0.02500(3) 0.378378(15) 0.01374(10) Uani 1 1 d . . . 
P2 P 0.15841(5) 0.21950(4) 0.351763(15) 0.01373(10) Uani 1 1 d . . . 
F1 F -0.32453(18) 0.19198(14) 0.45803(6) 0.0517(5) Uani 1 1 d . . . 
F2 F -0.34447(16) 0.20735(12) 0.39472(6) 0.0444(4) Uani 1 1 d . . . 
F3 F -0.19472(18) 0.25029(12) 0.42303(6) 0.0459(5) Uani 1 1 d . . . 
F4 F -0.18209(19) 0.27096(12) 0.22857(5) 0.0474(5) Uani 1 1 d . . . 
F5 F -0.02492(17) 0.29436(16) 0.25678(7) 0.0648(7) Uani 1 1 d . . . 
F6 F -0.16552(17) 0.37330(10) 0.27215(5) 0.0402(4) Uani 1 1 d . . . 
O1 O 0.53227(14) -0.02779(13) 0.29777(5) 0.0277(4) Uani 1 1 d . . . 
O2 O 0.52040(13) 0.08063(11) 0.34596(5) 0.0238(3) Uani 1 1 d . . . 
O3 O 0.45255(15) 0.14878(13) 0.48861(5) 0.0248(3) Uani 1 1 d . . . 
O4 O 0.45259(14) 0.04756(11) 0.43688(5) 0.0217(3) Uani 1 1 d . . . 
O5 O -0.15439(14) 0.08627(11) 0.37812(5) 0.0237(3) Uani 1 1 d . . . 
O6 O -0.30354(16) 0.01986(13) 0.41562(6) 0.0326(4) Uani 1 1 d . . . 
O7 O -0.13947(18) 0.07260(19) 0.45040(7) 0.0493(7) Uani 1 1 d . . . 
O8 O -0.10158(15) 0.24205(11) 0.33500(5) 0.0221(3) Uani 1 1 d . . . 
O9 O -0.13756(15) 0.13009(11) 0.28483(5) 0.0237(4) Uani 1 1 d . . . 
O10 O -0.28638(15) 0.22789(13) 0.30683(6) 0.0289(4) Uani 1 1 d . . . 
C1 C 0.32480(17) 0.05747(13) 0.36238(6) 0.0155(4) Uani 1 1 d . . . 
C2 C 0.23053(18) 0.00702(14) 0.35157(6) 0.0148(4) Uani 1 1 d . . . 
C3 C 0.23707(19) -0.05660(15) 0.32202(6) 0.0178(4) Uani 1 1 d . . . 
H3 H 0.1726 -0.0892 0.3152 0.021 Uiso 1 1 calc R . . 
C4 C 0.3374(2) -0.07391(16) 0.30186(7) 0.0214(4) Uani 1 1 d . . . 
H4 H 0.3421 -0.1173 0.2816 0.026 Uiso 1 1 calc R . . 
C5 C 0.42723(19) -0.02506(16) 0.31294(7) 0.0203(4) Uani 1 1 d . . . 
C6 C 0.42131(19) 0.03871(15) 0.34257(6) 0.0178(4) Uani 1 1 d . . . 
C7 C 0.5975(2) 0.02870(18) 0.32335(8) 0.0283(5) Uani 1 1 d . . . 
H7A H 0.6444 -0.0070 0.3413 0.034 Uiso 1 1 calc R . . 
H7B H 0.6461 0.0672 0.3072 0.034 Uiso 1 1 calc R . . 
C8 C 0.32326(18) 0.12675(14) 0.39355(6) 0.0156(4) Uani 1 1 d . . . 
C9 C 0.25902(18) 0.20487(14) 0.39134(6) 0.0152(4) Uani 1 1 d . . . 
C10 C 0.26077(19) 0.26599(15) 0.42257(6) 0.0187(4) Uani 1 1 d . . . 
H10 H 0.2170 0.3177 0.4204 0.022 Uiso 1 1 calc R . . 
C11 C 0.3246(2) 0.25351(15) 0.45688(6) 0.0204(4) Uani 1 1 d . . . 
H11 H 0.3260 0.2955 0.4778 0.025 Uiso 1 1 calc R . . 
C12 C 0.3849(2) 0.17740(16) 0.45862(6) 0.0191(4) Uani 1 1 d . . . 
C13 C 0.38552(18) 0.11680(14) 0.42774(6) 0.0176(4) Uani 1 1 d . . . 
C14 C 0.4864(2) 0.06159(16) 0.47734(6) 0.0236(5) Uani 1 1 d . . . 
H14A H 0.5678 0.0557 0.4797 0.028 Uiso 1 1 calc R . . 
H14B H 0.4511 0.0175 0.4950 0.028 Uiso 1 1 calc R . . 
C15 C 0.14074(18) 0.01129(14) 0.42996(6) 0.0165(4) Uani 1 1 d . . . 
C16 C 0.10159(19) 0.06906(16) 0.45876(6) 0.0187(4) Uani 1 1 d . . . 
H16 H 0.0560 0.1173 0.4513 0.022 Uiso 1 1 calc R . . 
C17 C 0.1296(2) 0.05591(18) 0.49868(7) 0.0260(5) Uani 1 1 d . . . 
C18 C 0.1994(2) -0.01333(19) 0.50844(7) 0.0285(5) Uani 1 1 d . . . 
H18 H 0.2185 -0.0224 0.5356 0.034 Uiso 1 1 calc R . . 
C19 C 0.2424(2) -0.06986(17) 0.47973(7) 0.0256(5) Uani 1 1 d . . . 
C20 C 0.2116(2) -0.05741(15) 0.44005(7) 0.0207(4) Uani 1 1 d . . . 
H20 H 0.2390 -0.0957 0.4200 0.025 Uiso 1 1 calc R . . 
C21 C 0.0800(3) 0.1138(2) 0.53044(8) 0.0443(8) Uani 1 1 d . . . 
H21A H 0.0667 0.1727 0.5195 0.066 Uiso 1 1 calc R . . 
H21B H 0.1314 0.1180 0.5529 0.066 Uiso 1 1 calc R . . 
H21C H 0.0097 0.0885 0.5395 0.066 Uiso 1 1 calc R . . 
C22 C 0.3209(3) -0.1429(2) 0.49069(9) 0.0440(8) Uani 1 1 d . . . 
H22A H 0.3341 -0.1420 0.5195 0.066 Uiso 1 1 calc R . . 
H22B H 0.3913 -0.1347 0.4766 0.066 Uiso 1 1 calc R . . 
H22C H 0.2884 -0.1996 0.4831 0.066 Uiso 1 1 calc R . . 
C23 C 0.00696(19) -0.06183(12) 0.36438(6) 0.0160(3) Uani 1 1 d . . . 
C24 C -0.0250(2) -0.12588(15) 0.39158(6) 0.0239(5) Uani 1 1 d . . . 
H24 H 0.0093 -0.1290 0.4170 0.029 Uiso 1 1 calc R . . 
C25 C -0.1085(3) -0.18589(17) 0.38107(8) 0.0297(6) Uani 1 1 d . . . 
C26 C -0.1571(2) -0.17965(17) 0.34395(8) 0.0274(5) Uani 1 1 d . . . 
H26 H -0.2135 -0.2204 0.3370 0.033 Uiso 1 1 calc R . . 
C27 C -0.1264(2) -0.11578(15) 0.31645(7) 0.0202(4) Uani 1 1 d . . . 
C28 C -0.04338(19) -0.05702(14) 0.32693(6) 0.0178(4) Uani 1 1 d . . . 
H28 H -0.0205 -0.0132 0.3085 0.021 Uiso 1 1 calc R . . 
C29 C -0.1448(4) -0.2543(2) 0.41086(10) 0.0515(10) Uani 1 1 d . . . 
H29A H -0.1890 -0.2262 0.4318 0.077 Uiso 1 1 calc R . . 
H29B H -0.0794 -0.2821 0.4227 0.077 Uiso 1 1 calc R . . 
H29C H -0.1897 -0.2991 0.3974 0.077 Uiso 1 1 calc R . . 
C30 C -0.1838(2) -0.10918(17) 0.27665(8) 0.0269(5) Uani 1 1 d . . . 
H30A H -0.1532 -0.0595 0.2617 0.040 Uiso 1 1 calc R . . 
H30B H -0.2634 -0.1000 0.2808 0.040 Uiso 1 1 calc R . . 
H30C H -0.1722 -0.1637 0.2617 0.040 Uiso 1 1 calc R . . 
C31 C 0.12632(18) 0.33608(13) 0.35266(6) 0.0168(4) Uani 1 1 d . . . 
C32 C 0.1885(2) 0.39517(15) 0.33019(6) 0.0187(4) Uani 1 1 d . . . 
H32 H 0.2430 0.3740 0.3122 0.022 Uiso 1 1 calc R . . 
C33 C 0.1709(2) 0.48565(15) 0.33409(7) 0.0222(4) Uani 1 1 d . . . 
C34 C 0.0901(2) 0.51434(15) 0.36055(7) 0.0244(5) Uani 1 1 d . . . 
H34 H 0.0778 0.5757 0.3634 0.029 Uiso 1 1 calc R . . 
C35 C 0.0266(2) 0.45643(15) 0.38305(7) 0.0231(5) Uani 1 1 d . . . 
C36 C 0.04461(19) 0.36682(15) 0.37885(6) 0.0197(4) Uani 1 1 d . . . 
H36 H 0.0015 0.3262 0.3937 0.024 Uiso 1 1 calc R . . 
C37 C 0.2387(3) 0.54994(17) 0.31049(9) 0.0333(6) Uani 1 1 d . . . 
H37A H 0.2634 0.5978 0.3279 0.050 Uiso 1 1 calc R . . 
H37B H 0.1936 0.5741 0.2889 0.050 Uiso 1 1 calc R . . 
H37C H 0.3034 0.5199 0.2993 0.050 Uiso 1 1 calc R . . 
C38 C -0.0586(2) 0.49061(19) 0.41204(9) 0.0328(6) Uani 1 1 d . . . 
H38A H -0.0965 0.4410 0.4247 0.049 Uiso 1 1 calc R . . 
H38B H -0.1129 0.5267 0.3978 0.049 Uiso 1 1 calc R . . 
H38C H -0.0219 0.5263 0.4324 0.049 Uiso 1 1 calc R . . 
C39 C 0.21889(19) 0.19336(13) 0.30393(6) 0.0155(4) Uani 1 1 d . . . 
C40 C 0.14931(19) 0.15479(15) 0.27565(6) 0.0174(4) Uani 1 1 d . . . 
H40 H 0.0744 0.1424 0.2823 0.021 Uiso 1 1 calc R . . 
C41 C 0.18877(19) 0.13439(15) 0.23780(6) 0.0188(4) Uani 1 1 d . . . 
C42 C 0.29917(19) 0.15216(16) 0.22915(6) 0.0203(4) Uani 1 1 d . . . 
H42 H 0.3270 0.1379 0.2035 0.024 Uiso 1 1 calc R . . 
C43 C 0.3704(2) 0.19031(16) 0.25693(7) 0.0209(4) Uani 1 1 d . . . 
C44 C 0.32947(19) 0.21096(15) 0.29474(6) 0.0185(4) Uani 1 1 d . . . 
H44 H 0.3767 0.2369 0.3141 0.022 Uiso 1 1 calc R . . 
C45 C 0.1123(2) 0.09434(18) 0.20728(7) 0.0275(5) Uani 1 1 d . . . 
H45A H 0.0942 0.1384 0.1870 0.041 Uiso 1 1 calc R . . 
H45B H 0.0440 0.0746 0.2203 0.041 Uiso 1 1 calc R . . 
H45C H 0.1489 0.0440 0.1947 0.041 Uiso 1 1 calc R . . 
C46 C 0.4897(2) 0.2091(2) 0.24624(7) 0.0326(6) Uani 1 1 d . . . 
H46A H 0.5160 0.1649 0.2273 0.049 Uiso 1 1 calc R . . 
H46B H 0.5354 0.2071 0.2703 0.049 Uiso 1 1 calc R . . 
H46C H 0.4951 0.2677 0.2342 0.049 Uiso 1 1 calc R . . 
C47 C -0.2730(2) 0.18810(19) 0.42292(8) 0.0313(6) Uani 1 1 d . . . 
C48 C -0.1329(2) 0.29265(18) 0.26265(9) 0.0314(6) Uani 1 1 d . . . 
Cl1A Cl 0.46654(6) 0.37172(6) 0.370642(18) 0.03792(16) Uani 1 1 d . . . 
Cl2A Cl 0.53405(7) 0.43943(6) 0.29406(2) 0.04188(17) Uani 1 1 d . . . 
Cl3A Cl 0.68224(7) 0.45255(6) 0.36159(3) 0.0498(2) Uani 1 1 d . . . 
C1A C 0.5792(2) 0.38923(19) 0.33847(7) 0.0289(5) Uani 1 1 d . . . 
D1A D 0.6118 0.3307 0.3316 0.035 Uiso 1 1 calc R . . 
Cl1B Cl 0.41253(9) 0.62261(6) 0.48817(3) 0.0585(2) Uani 1 1 d . . . 
Cl2B Cl 0.17444(11) 0.63465(9) 0.49395(5) 0.0838(4) Uani 1 1 d . . . 
Cl3B Cl 0.27306(17) 0.50774(9) 0.44233(5) 0.1159(7) Uani 1 1 d . . . 
C1B C 0.2872(4) 0.5650(2) 0.48730(11) 0.0577(11) Uani 1 1 d . . . 
D1B D 0.2878 0.5212 0.5095 0.069 Uiso 1 1 calc R . . 
Cl1C Cl 0.32396(16) 0.74374(11) 0.38514(6) 0.0669(6) Uani 0.684(3) 1 d PG A 1 
Cl2C Cl 0.5256(2) 0.84291(12) 0.39548(7) 0.0696(6) Uani 0.684(3) 1 d PG A 1 
Cl3C Cl 0.53573(19) 0.66045(13) 0.37232(6) 0.0647(5) Uani 0.684(3) 1 d PG A 1 
C1C C 0.46056(19) 0.75842(10) 0.36911(4) 0.0607(16) Uani 0.684(3) 1 d PG A 1 
D1C D 0.4582 0.7761 0.3405 0.073 Uiso 0.684(3) 1 calc PR A 1 
Cl1D Cl 0.3639(4) 0.7546(3) 0.36954(13) 0.0669(6) Uani 0.316(3) 1 d PG A 2 
Cl3D Cl 0.5587(4) 0.6487(3) 0.38293(14) 0.0647(5) Uani 0.316(3) 1 d PG A 2 
Cl2D Cl 0.5615(5) 0.8336(3) 0.40207(18) 0.0696(6) Uani 0.316(3) 1 d PG A 2 
C1D C 0.4807(4) 0.7384(2) 0.39946(8) 0.0607(16) Uani 0.316(3) 1 d PG A 2 
D1D D 0.4542 0.7247 0.4270 0.073 Uiso 0.316(3) 1 calc PR A 2 
 
loop_ 
 _atom_site_aniso_label 
 _atom_site_aniso_U_11 
 _atom_site_aniso_U_22 
 _atom_site_aniso_U_33 
 _atom_site_aniso_U_23 
 _atom_site_aniso_U_13 
 _atom_site_aniso_U_12 
Pd1 0.01277(6) 0.01482(6) 0.01336(6) 0.00138(5) -0.00053(6) 0.00057(6) 
S1 0.0158(3) 0.0326(3) 0.0278(3) 0.0093(2) 0.0008(2) -0.0025(2) 
S2 0.0163(2) 0.0194(2) 0.0203(2) 0.00336(19) -0.00363(19) 0.0008(2) 
P1 0.0148(2) 0.0149(2) 0.0115(2) 0.00021(18) -0.00048(18) 0.00018(19) 
P2 0.0145(2) 0.0148(2) 0.0119(2) 0.00006(17) -0.00086(18) 0.00011(19) 
F1 0.0583(13) 0.0579(12) 0.0389(10) -0.0156(9) 0.0262(9) -0.0138(10) 
F2 0.0426(11) 0.0365(9) 0.0541(11) -0.0043(8) -0.0069(9) 0.0148(8) 
F3 0.0508(12) 0.0399(10) 0.0470(11) -0.0134(8) 0.0157(9) -0.0193(9) 
F4 0.0835(15) 0.0349(9) 0.0238(8) 0.0075(7) -0.0076(9) 0.0151(10) 
F5 0.0371(12) 0.0701(14) 0.0873(16) 0.0553(13) 0.0223(10) 0.0095(10) 
F6 0.0564(11) 0.0218(8) 0.0425(9) 0.0093(7) -0.0139(8) 0.0026(7) 
O1 0.0175(8) 0.0350(9) 0.0305(9) -0.0146(8) 0.0061(7) -0.0020(7) 
O2 0.0155(9) 0.0281(8) 0.0278(8) -0.0101(6) 0.0018(6) -0.0022(6) 
O3 0.0255(8) 0.0319(9) 0.0170(7) -0.0010(7) -0.0087(6) 0.0050(8) 
O4 0.0221(8) 0.0243(8) 0.0186(7) 0.0010(6) -0.0043(6) 0.0060(7) 
O5 0.0170(8) 0.0227(8) 0.0314(8) 0.0009(7) 0.0058(7) -0.0016(6) 
O6 0.0217(9) 0.0333(10) 0.0429(11) 0.0061(8) 0.0075(8) -0.0044(8) 
O7 0.0240(11) 0.0832(18) 0.0407(12) 0.0298(12) -0.0084(9) -0.0098(11) 
O8 0.0198(8) 0.0190(8) 0.0275(8) 0.0025(6) -0.0080(7) 0.0014(6) 
O9 0.0262(9) 0.0213(8) 0.0237(8) -0.0007(6) -0.0023(6) 0.0024(7) 
O10 0.0157(8) 0.0339(10) 0.0371(10) 0.0006(8) -0.0048(7) 0.0021(7) 
C1 0.0175(9) 0.0159(8) 0.0131(8) -0.0009(7) 0.0000(8) 0.0013(7) 
C2 0.0149(10) 0.0169(9) 0.0125(8) -0.0005(7) -0.0002(7) 0.0040(7) 
C3 0.0167(10) 0.0208(10) 0.0161(9) -0.0049(8) 0.0010(7) -0.0003(8) 
C4 0.0198(11) 0.0252(11) 0.0190(9) -0.0063(8) 0.0014(8) 0.0025(9) 
C5 0.0156(10) 0.0269(11) 0.0183(9) -0.0047(8) 0.0027(8) 0.0014(9) 
C6 0.0150(10) 0.0199(10) 0.0186(9) -0.0008(8) -0.0010(7) -0.0013(8) 
C7 0.0184(12) 0.0330(13) 0.0336(13) -0.0133(11) 0.0045(10) -0.0011(10) 
C8 0.0140(9) 0.0180(9) 0.0149(8) -0.0016(7) -0.0002(7) -0.0004(7) 
C9 0.0155(10) 0.0183(9) 0.0117(8) -0.0004(7) -0.0012(7) -0.0019(8) 
C10 0.0194(11) 0.0194(10) 0.0172(9) -0.0026(8) -0.0018(8) -0.0002(8) 
C11 0.0235(12) 0.0211(10) 0.0166(9) -0.0057(8) -0.0029(8) -0.0001(9) 
C12 0.0166(10) 0.0252(10) 0.0155(9) -0.0014(8) -0.0045(8) -0.0020(8) 
C13 0.0145(10) 0.0196(9) 0.0188(9) 0.0011(7) -0.0007(8) 0.0014(8) 
C14 0.0243(13) 0.0293(11) 0.0172(9) 0.0018(8) -0.0058(9) 0.0024(10) 
C15 0.0171(10) 0.0196(10) 0.0127(8) 0.0018(7) -0.0021(7) 0.0009(8) 
C16 0.0158(10) 0.0253(11) 0.0151(9) -0.0033(8) -0.0006(7) 0.0006(9) 
C17 0.0255(13) 0.0387(14) 0.0137(9) -0.0044(9) -0.0008(8) -0.0031(10) 
C18 0.0318(14) 0.0381(14) 0.0157(10) 0.0050(9) -0.0043(9) -0.0083(11) 
C19 0.0296(13) 0.0253(11) 0.0219(10) 0.0095(9) -0.0079(9) -0.0012(10) 
C20 0.0234(11) 0.0206(10) 0.0183(9) 0.0027(8) -0.0021(8) 0.0015(9) 
C21 0.051(2) 0.060(2) 0.0214(12) -0.0158(13) -0.0011(12) 0.0011(16) 
C22 0.057(2) 0.0355(15) 0.0389(15) 0.0151(13) -0.0182(14) 0.0088(16) 
C23 0.0164(9) 0.0153(8) 0.0161(8) -0.0002(6) 0.0017(9) -0.0013(8) 
C24 0.0354(14) 0.0197(10) 0.0166(9) 0.0030(7) -0.0002(8) -0.0059(9) 
C25 0.0427(16) 0.0226(11) 0.0239(11) 0.0001(9) 0.0029(11) -0.0133(11) 
C26 0.0296(13) 0.0247(11) 0.0277(12) -0.0032(9) 0.0027(10) -0.0100(10) 
C27 0.0200(11) 0.0206(10) 0.0202(9) -0.0056(8) -0.0017(8) -0.0004(8) 
C28 0.0188(10) 0.0165(9) 0.0181(9) 0.0002(7) -0.0001(8) -0.0009(8) 
C29 0.080(3) 0.0422(17) 0.0321(15) 0.0083(13) -0.0020(16) -0.0371(18) 
C30 0.0259(13) 0.0281(12) 0.0265(11) -0.0063(9) -0.0063(10) 0.0003(10) 
C31 0.0179(10) 0.0143(9) 0.0181(9) -0.0010(7) -0.0057(7) 0.0014(7) 
C32 0.0196(11) 0.0188(10) 0.0177(9) -0.0001(7) -0.0037(8) -0.0004(8) 
C33 0.0275(12) 0.0159(10) 0.0233(10) 0.0021(8) -0.0066(9) -0.0009(9) 
C34 0.0306(12) 0.0174(10) 0.0251(10) -0.0027(9) -0.0080(10) 0.0030(9) 
C35 0.0263(13) 0.0209(10) 0.0222(10) -0.0039(8) -0.0066(8) 0.0066(8) 
C36 0.0190(10) 0.0213(10) 0.0189(9) -0.0022(8) -0.0021(8) -0.0001(8) 
C37 0.0445(17) 0.0221(12) 0.0335(13) 0.0040(10) -0.0006(12) -0.0047(11) 
C38 0.0325(15) 0.0309(13) 0.0350(13) -0.0119(11) -0.0005(11) 0.0079(11) 
C39 0.0197(10) 0.0136(9) 0.0133(8) 0.0009(7) -0.0011(8) 0.0001(8) 
C40 0.0158(10) 0.0190(10) 0.0173(9) 0.0012(8) -0.0026(7) -0.0010(8) 
C41 0.0224(11) 0.0196(10) 0.0144(8) -0.0003(7) -0.0030(7) 0.0012(8) 
C42 0.0232(11) 0.0245(11) 0.0133(8) -0.0008(8) 0.0012(7) 0.0033(9) 
C43 0.0190(11) 0.0259(11) 0.0178(10) 0.0003(8) 0.0014(8) 0.0011(9) 
C44 0.0193(10) 0.0211(10) 0.0151(9) 0.0005(7) -0.0025(8) -0.0014(8) 
C45 0.0272(13) 0.0362(13) 0.0192(10) -0.0061(9) -0.0034(9) -0.0043(11) 
C46 0.0206(13) 0.0533(16) 0.0238(10) -0.0039(10) 0.0045(10) -0.0058(13) 
C47 0.0317(14) 0.0337(14) 0.0284(12) -0.0054(10) 0.0063(11) -0.0039(11) 
C48 0.0313(14) 0.0282(13) 0.0347(13) 0.0135(11) -0.0014(11) 0.0046(11) 
Cl1A 0.0275(3) 0.0645(5) 0.0218(3) -0.0022(3) 0.0015(2) -0.0118(3) 
Cl2A 0.0505(4) 0.0510(4) 0.0242(3) 0.0073(3) 0.0039(3) 0.0107(3) 
Cl3A 0.0350(4) 0.0673(5) 0.0472(4) 0.0031(4) -0.0020(3) -0.0210(4) 
C1A 0.0249(13) 0.0387(14) 0.0232(11) 0.0012(10) 0.0027(9) 0.0021(11) 
Cl1B 0.0627(6) 0.0450(5) 0.0678(6) -0.0099(4) -0.0087(5) 0.0100(4) 
Cl2B 0.0654(7) 0.0648(7) 0.1213(11) -0.0111(7) 0.0162(7) -0.0246(6) 
Cl3B 0.1801(17) 0.0699(8) 0.0975(10) -0.0448(7) -0.0809(11) 0.0247(10) 
C1B 0.100(3) 0.0273(15) 0.0460(18) 0.0070(13) -0.030(2) -0.0146(18) 
Cl1C 0.0930(15) 0.0508(7) 0.0569(11) -0.0178(8) -0.0103(9) 0.0226(9) 
Cl2C 0.119(2) 0.0437(7) 0.0457(10) 0.0021(6) -0.0081(10) -0.0014(10) 
Cl3C 0.0996(14) 0.0462(8) 0.0483(11) -0.0005(7) 0.0232(10) 0.0200(7) 
C1C 0.104(5) 0.044(2) 0.033(2) -0.0025(18) 0.010(2) 0.022(3) 
Cl1D 0.0930(15) 0.0508(7) 0.0569(11) -0.0178(8) -0.0103(9) 0.0226(9) 
Cl3D 0.0996(14) 0.0462(8) 0.0483(11) -0.0005(7) 0.0232(10) 0.0200(7) 
Cl2D 0.119(2) 0.0437(7) 0.0457(10) 0.0021(6) -0.0081(10) -0.0014(10) 
C1D 0.104(5) 0.044(2) 0.033(2) -0.0025(18) 0.010(2) 0.022(3) 
 
_geom_special_details 
; 
 All esds (except the esd in the dihedral angle between two l.s. planes) 
 are estimated using the full covariance matrix.  The cell esds are taken 
 into account individually in the estimation of esds in distances, angles 
 and torsion angles; correlations between esds in cell parameters are only 
 used when they are defined by crystal symmetry.  An approximate (isotropic) 
 treatment of cell esds is used for estimating esds involving l.s. planes. 
; 
 
loop_ 
 _geom_bond_atom_site_label_1 
 _geom_bond_atom_site_label_2 
 _geom_bond_distance 
 _geom_bond_site_symmetry_2 
 _geom_bond_publ_flag 
Pd1 O5 2.1541(17) . ? 
Pd1 O8 2.1595(16) . ? 
Pd1 P2 2.2305(6) . ? 
Pd1 P1 2.2382(6) . ? 
S1 O6 1.430(2) . ? 
S1 O7 1.436(2) . ? 
S1 O5 1.4705(18) . ? 
S1 C47 1.825(3) . ? 
S2 O10 1.4326(19) . ? 
S2 O9 1.4340(18) . ? 
S2 O8 1.4731(17) . ? 
S2 C48 1.825(3) . ? 
P1 C15 1.806(2) . ? 
P1 C2 1.810(2) . ? 
P1 C23 1.814(2) . ? 
P2 C39 1.810(2) . ? 
P2 C9 1.815(2) . ? 
P2 C31 1.815(2) . ? 
F1 C47 1.335(3) . ? 
F2 C47 1.314(3) . ? 
F3 C47 1.337(3) . ? 
F4 C48 1.331(3) . ? 
F5 C48 1.318(3) . ? 
F6 C48 1.327(3) . ? 
O1 C5 1.367(3) . ? 
O1 C7 1.448(3) . ? 
O2 C6 1.360(3) . ? 
O2 C7 1.437(3) . ? 
O3 C12 1.368(3) . ? 
O3 C14 1.438(3) . ? 
O4 C13 1.363(3) . ? 
O4 C14 1.435(3) . ? 
C1 C6 1.372(3) . ? 
C1 C2 1.419(3) . ? 
C1 C8 1.486(3) . ? 
C2 C3 1.388(3) . ? 
C3 C4 1.412(3) . ? 
C3 H3 0.9500 . ? 
C4 C5 1.366(3) . ? 
C4 H4 0.9500 . ? 
C5 C6 1.392(3) . ? 
C7 H7A 0.9900 . ? 
C7 H7B 0.9900 . ? 
C8 C13 1.381(3) . ? 
C8 C9 1.420(3) . ? 
C9 C10 1.402(3) . ? 
C10 C11 1.400(3) . ? 
C10 H10 0.9500 . ? 
C11 C12 1.368(3) . ? 
C11 H11 0.9500 . ? 
C12 C13 1.388(3) . ? 
C14 H14A 0.9900 . ? 
C14 H14B 0.9900 . ? 
C15 C16 1.390(3) . ? 
C15 C20 1.392(3) . ? 
C16 C17 1.398(3) . ? 
C16 H16 0.9500 . ? 
C17 C18 1.388(4) . ? 
C17 C21 1.508(4) . ? 
C18 C19 1.392(4) . ? 
C18 H18 0.9500 . ? 
C19 C20 1.397(3) . ? 
C19 C22 1.506(4) . ? 
C20 H20 0.9500 . ? 
C21 H21A 0.9800 . ? 
C21 H21B 0.9800 . ? 
C21 H21C 0.9800 . ? 
C22 H22A 0.9800 . ? 
C22 H22B 0.9800 . ? 
C22 H22C 0.9800 . ? 
C23 C24 1.390(3) . ? 
C23 C28 1.400(3) . ? 
C24 C25 1.405(3) . ? 
C24 H24 0.9500 . ? 
C25 C26 1.382(4) . ? 
C25 C29 1.509(4) . ? 
C26 C27 1.391(3) . ? 
C26 H26 0.9500 . ? 
C27 C28 1.388(3) . ? 
C27 C30 1.510(3) . ? 
C28 H28 0.9500 . ? 
C29 H29A 0.9800 . ? 
C29 H29B 0.9800 . ? 
C29 H29C 0.9800 . ? 
C30 H30A 0.9800 . ? 
C30 H30B 0.9800 . ? 
C30 H30C 0.9800 . ? 
C31 C32 1.393(3) . ? 
C31 C36 1.402(3) . ? 
C32 C33 1.398(3) . ? 
C32 H32 0.9500 . ? 
C33 C34 1.390(4) . ? 
C33 C37 1.502(4) . ? 
C34 C35 1.391(4) . ? 
C34 H34 0.9500 . ? 
C35 C36 1.387(3) . ? 
C35 C38 1.509(4) . ? 
C36 H36 0.9500 . ? 
C37 H37A 0.9800 . ? 
C37 H37B 0.9800 . ? 
C37 H37C 0.9800 . ? 
C38 H38A 0.9800 . ? 
C38 H38B 0.9800 . ? 
C38 H38C 0.9800 . ? 
C39 C44 1.396(3) . ? 
C39 C40 1.397(3) . ? 
C40 C41 1.393(3) . ? 
C40 H40 0.9500 . ? 
C41 C42 1.390(3) . ? 
C41 C45 1.508(3) . ? 
C42 C43 1.396(3) . ? 
C42 H42 0.9500 . ? 
C43 C44 1.399(3) . ? 
C43 C46 1.511(4) . ? 
C44 H44 0.9500 . ? 
C45 H45A 0.9800 . ? 
C45 H45B 0.9800 . ? 
C45 H45C 0.9800 . ? 
C46 H46A 0.9800 . ? 
C46 H46B 0.9800 . ? 
C46 H46C 0.9800 . ? 
Cl1A C1A 1.757(3) . ? 
Cl2A C1A 1.763(3) . ? 
Cl3A C1A 1.754(3) . ? 
C1A D1A 1.0000 . ? 
Cl1B C1B 1.748(4) . ? 
Cl2B C1B 1.739(5) . ? 
Cl3B C1B 1.752(4) . ? 
C1B D1B 1.0000 . ? 
Cl1C C1C 1.7485 . ? 
Cl2C C1C 1.7472 . ? 
Cl3C C1C 1.7474 . ? 
C1C D1C 1.0000 . ? 
Cl1D C1D 1.7485 . ? 
Cl3D C1D 1.7472 . ? 
Cl2D C1D 1.7474 . ? 
C1D D1D 1.0000 . ? 
 
loop_ 
 _geom_angle_atom_site_label_1 
 _geom_angle_atom_site_label_2 
 _geom_angle_atom_site_label_3 
 _geom_angle 
 _geom_angle_site_symmetry_1 
 _geom_angle_site_symmetry_3 
 _geom_angle_publ_flag 
O5 Pd1 O8 82.67(7) . . ? 
O5 Pd1 P2 172.21(5) . . ? 
O8 Pd1 P2 93.80(5) . . ? 
O5 Pd1 P1 94.90(5) . . ? 
O8 Pd1 P1 166.63(5) . . ? 
P2 Pd1 P1 90.10(2) . . ? 
O6 S1 O7 116.38(13) . . ? 
O6 S1 O5 112.96(12) . . ? 
O7 S1 O5 114.52(12) . . ? 
O6 S1 C47 105.18(13) . . ? 
O7 S1 C47 102.59(16) . . ? 
O5 S1 C47 103.14(11) . . ? 
O10 S2 O9 117.14(11) . . ? 
O10 S2 O8 113.66(11) . . ? 
O9 S2 O8 113.75(10) . . ? 
O10 S2 C48 103.50(12) . . ? 
O9 S2 C48 104.15(12) . . ? 
O8 S2 C48 102.28(12) . . ? 
C15 P1 C2 103.99(10) . . ? 
C15 P1 C23 109.11(10) . . ? 
C2 P1 C23 107.66(10) . . ? 
C15 P1 Pd1 117.24(7) . . ? 
C2 P1 Pd1 117.63(7) . . ? 
C23 P1 Pd1 100.75(7) . . ? 
C39 P2 C9 110.75(10) . . ? 
C39 P2 C31 108.38(10) . . ? 
C9 P2 C31 104.50(10) . . ? 
C39 P2 Pd1 111.87(7) . . ? 
C9 P2 Pd1 112.35(7) . . ? 
C31 P2 Pd1 108.62(8) . . ? 
C5 O1 C7 105.33(17) . . ? 
C6 O2 C7 105.51(18) . . ? 
C12 O3 C14 105.57(17) . . ? 
C13 O4 C14 105.50(17) . . ? 
S1 O5 Pd1 131.00(11) . . ? 
S2 O8 Pd1 117.09(10) . . ? 
C6 C1 C2 116.35(19) . . ? 
C6 C1 C8 120.03(19) . . ? 
C2 C1 C8 123.63(19) . . ? 
C3 C2 C1 120.94(19) . . ? 
C3 C2 P1 120.64(17) . . ? 
C1 C2 P1 118.39(15) . . ? 
C2 C3 C4 121.5(2) . . ? 
C2 C3 H3 119.3 . . ? 
C4 C3 H3 119.3 . . ? 
C5 C4 C3 116.6(2) . . ? 
C5 C4 H4 121.7 . . ? 
C3 C4 H4 121.7 . . ? 
C4 C5 O1 128.2(2) . . ? 
C4 C5 C6 122.2(2) . . ? 
O1 C5 C6 109.6(2) . . ? 
O2 C6 C1 127.5(2) . . ? 
O2 C6 C5 109.96(19) . . ? 
C1 C6 C5 122.4(2) . . ? 
O2 C7 O1 106.75(19) . . ? 
O2 C7 H7A 110.4 . . ? 
O1 C7 H7A 110.4 . . ? 
O2 C7 H7B 110.4 . . ? 
O1 C7 H7B 110.4 . . ? 
H7A C7 H7B 108.6 . . ? 
C13 C8 C9 115.59(18) . . ? 
C13 C8 C1 120.13(19) . . ? 
C9 C8 C1 124.27(18) . . ? 
C10 C9 C8 120.47(19) . . ? 
C10 C9 P2 118.52(17) . . ? 
C8 C9 P2 120.40(15) . . ? 
C11 C10 C9 122.4(2) . . ? 
C11 C10 H10 118.8 . . ? 
C9 C10 H10 118.8 . . ? 
C12 C11 C10 116.3(2) . . ? 
C12 C11 H11 121.9 . . ? 
C10 C11 H11 121.9 . . ? 
C11 C12 O3 128.1(2) . . ? 
C11 C12 C13 122.2(2) . . ? 
O3 C12 C13 109.7(2) . . ? 
O4 C13 C8 126.5(2) . . ? 
O4 C13 C12 110.34(19) . . ? 
C8 C13 C12 123.1(2) . . ? 
O4 C14 O3 107.82(17) . . ? 
O4 C14 H14A 110.1 . . ? 
O3 C14 H14A 110.1 . . ? 
O4 C14 H14B 110.1 . . ? 
O3 C14 H14B 110.1 . . ? 
H14A C14 H14B 108.5 . . ? 
C16 C15 C20 120.9(2) . . ? 
C16 C15 P1 120.56(17) . . ? 
C20 C15 P1 118.53(16) . . ? 
C15 C16 C17 119.7(2) . . ? 
C15 C16 H16 120.1 . . ? 
C17 C16 H16 120.1 . . ? 
C18 C17 C16 118.8(2) . . ? 
C18 C17 C21 121.1(2) . . ? 
C16 C17 C21 120.0(3) . . ? 
C17 C18 C19 122.0(2) . . ? 
C17 C18 H18 119.0 . . ? 
C19 C18 H18 119.0 . . ? 
C18 C19 C20 118.6(2) . . ? 
C18 C19 C22 121.3(2) . . ? 
C20 C19 C22 120.0(2) . . ? 
C15 C20 C19 119.8(2) . . ? 
C15 C20 H20 120.1 . . ? 
C19 C20 H20 120.1 . . ? 
C17 C21 H21A 109.5 . . ? 
C17 C21 H21B 109.5 . . ? 
H21A C21 H21B 109.5 . . ? 
C17 C21 H21C 109.5 . . ? 
H21A C21 H21C 109.5 . . ? 
H21B C21 H21C 109.5 . . ? 
C19 C22 H22A 109.5 . . ? 
C19 C22 H22B 109.5 . . ? 
H22A C22 H22B 109.5 . . ? 
C19 C22 H22C 109.5 . . ? 
H22A C22 H22C 109.5 . . ? 
H22B C22 H22C 109.5 . . ? 
C24 C23 C28 120.5(2) . . ? 
C24 C23 P1 121.02(16) . . ? 
C28 C23 P1 118.08(15) . . ? 
C23 C24 C25 119.3(2) . . ? 
C23 C24 H24 120.4 . . ? 
C25 C24 H24 120.4 . . ? 
C26 C25 C24 119.1(2) . . ? 
C26 C25 C29 121.5(2) . . ? 
C24 C25 C29 119.3(2) . . ? 
C25 C26 C27 122.3(2) . . ? 
C25 C26 H26 118.8 . . ? 
C27 C26 H26 118.8 . . ? 
C28 C27 C26 118.2(2) . . ? 
C28 C27 C30 120.9(2) . . ? 
C26 C27 C30 120.9(2) . . ? 
C27 C28 C23 120.5(2) . . ? 
C27 C28 H28 119.7 . . ? 
C23 C28 H28 119.7 . . ? 
C25 C29 H29A 109.5 . . ? 
C25 C29 H29B 109.5 . . ? 
H29A C29 H29B 109.5 . . ? 
C25 C29 H29C 109.5 . . ? 
H29A C29 H29C 109.5 . . ? 
H29B C29 H29C 109.5 . . ? 
C27 C30 H30A 109.5 . . ? 
C27 C30 H30B 109.5 . . ? 
H30A C30 H30B 109.5 . . ? 
C27 C30 H30C 109.5 . . ? 
H30A C30 H30C 109.5 . . ? 
H30B C30 H30C 109.5 . . ? 
C32 C31 C36 120.3(2) . . ? 
C32 C31 P2 120.40(17) . . ? 
C36 C31 P2 119.09(17) . . ? 
C31 C32 C33 120.1(2) . . ? 
C31 C32 H32 119.9 . . ? 
C33 C32 H32 119.9 . . ? 
C34 C33 C32 118.4(2) . . ? 
C34 C33 C37 121.1(2) . . ? 
C32 C33 C37 120.5(2) . . ? 
C33 C34 C35 122.4(2) . . ? 
C33 C34 H34 118.8 . . ? 
C35 C34 H34 118.8 . . ? 
C36 C35 C34 118.7(2) . . ? 
C36 C35 C38 120.7(2) . . ? 
C34 C35 C38 120.6(2) . . ? 
C35 C36 C31 120.1(2) . . ? 
C35 C36 H36 119.9 . . ? 
C31 C36 H36 119.9 . . ? 
C33 C37 H37A 109.5 . . ? 
C33 C37 H37B 109.5 . . ? 
H37A C37 H37B 109.5 . . ? 
C33 C37 H37C 109.5 . . ? 
H37A C37 H37C 109.5 . . ? 
H37B C37 H37C 109.5 . . ? 
C35 C38 H38A 109.5 . . ? 
C35 C38 H38B 109.5 . . ? 
H38A C38 H38B 109.5 . . ? 
C35 C38 H38C 109.5 . . ? 
H38A C38 H38C 109.5 . . ? 
H38B C38 H38C 109.5 . . ? 
C44 C39 C40 120.3(2) . . ? 
C44 C39 P2 122.69(16) . . ? 
C40 C39 P2 117.00(17) . . ? 
C41 C40 C39 120.6(2) . . ? 
C41 C40 H40 119.7 . . ? 
C39 C40 H40 119.7 . . ? 
C42 C41 C40 118.4(2) . . ? 
C42 C41 C45 121.5(2) . . ? 
C40 C41 C45 120.1(2) . . ? 
C41 C42 C43 122.1(2) . . ? 
C41 C42 H42 118.9 . . ? 
C43 C42 H42 118.9 . . ? 
C42 C43 C44 118.9(2) . . ? 
C42 C43 C46 120.4(2) . . ? 
C44 C43 C46 120.7(2) . . ? 
C39 C44 C43 119.7(2) . . ? 
C39 C44 H44 120.1 . . ? 
C43 C44 H44 120.1 . . ? 
C41 C45 H45A 109.5 . . ? 
C41 C45 H45B 109.5 . . ? 
H45A C45 H45B 109.5 . . ? 
C41 C45 H45C 109.5 . . ? 
H45A C45 H45C 109.5 . . ? 
H45B C45 H45C 109.5 . . ? 
C43 C46 H46A 109.5 . . ? 
C43 C46 H46B 109.5 . . ? 
H46A C46 H46B 109.5 . . ? 
C43 C46 H46C 109.5 . . ? 
H46A C46 H46C 109.5 . . ? 
H46B C46 H46C 109.5 . . ? 
F2 C47 F1 108.7(2) . . ? 
F2 C47 F3 108.0(2) . . ? 
F1 C47 F3 107.2(2) . . ? 
F2 C47 S1 112.58(19) . . ? 
F1 C47 S1 109.4(2) . . ? 
F3 C47 S1 110.8(2) . . ? 
F5 C48 F6 108.1(3) . . ? 
F5 C48 F4 108.5(3) . . ? 
F6 C48 F4 107.7(2) . . ? 
F5 C48 S2 111.27(18) . . ? 
F6 C48 S2 111.5(2) . . ? 
F4 C48 S2 109.6(2) . . ? 
Cl3A C1A Cl1A 111.04(14) . . ? 
Cl3A C1A Cl2A 110.88(16) . . ? 
Cl1A C1A Cl2A 110.32(15) . . ? 
Cl3A C1A D1A 108.2 . . ? 
Cl1A C1A D1A 108.2 . . ? 
Cl2A C1A D1A 108.2 . . ? 
Cl2B C1B Cl1B 111.67(18) . . ? 
Cl2B C1B Cl3B 109.7(2) . . ? 
Cl1B C1B Cl3B 110.3(3) . . ? 
Cl2B C1B D1B 108.3 . . ? 
Cl1B C1B D1B 108.3 . . ? 
Cl3B C1B D1B 108.3 . . ? 
Cl2C C1C Cl3C 111.2 . . ? 
Cl2C C1C Cl1C 111.2 . . ? 
Cl3C C1C Cl1C 111.2 . . ? 
Cl2C C1C D1C 107.7 . . ? 
Cl3C C1C D1C 107.7 . . ? 
Cl1C C1C D1C 107.7 . . ? 
Cl3D C1D Cl2D 111.2 . . ? 
Cl3D C1D Cl1D 111.2 . . ? 
Cl2D C1D Cl1D 111.2 . . ? 
Cl3D C1D D1D 107.7 . . ? 
Cl2D C1D D1D 107.7 . . ? 
Cl1D C1D D1D 107.7 . . ? 
 
loop_ 
 _geom_torsion_atom_site_label_1 
 _geom_torsion_atom_site_label_2 
 _geom_torsion_atom_site_label_3 
 _geom_torsion_atom_site_label_4 
 _geom_torsion 
 _geom_torsion_site_symmetry_1 
 _geom_torsion_site_symmetry_2 
 _geom_torsion_site_symmetry_3 
 _geom_torsion_site_symmetry_4 
 _geom_torsion_publ_flag 
O5 Pd1 P1 C15 -84.00(10) . . . . ? 
O8 Pd1 P1 C15 -162.9(2) . . . . ? 
P2 Pd1 P1 C15 90.02(8) . . . . ? 
O5 Pd1 P1 C2 150.81(9) . . . . ? 
O8 Pd1 P1 C2 71.9(2) . . . . ? 
P2 Pd1 P1 C2 -35.17(8) . . . . ? 
O5 Pd1 P1 C23 34.20(8) . . . . ? 
O8 Pd1 P1 C23 -44.7(2) . . . . ? 
P2 Pd1 P1 C23 -151.78(7) . . . . ? 
O5 Pd1 P2 C39 -151.5(4) . . . . ? 
O8 Pd1 P2 C39 -88.73(9) . . . . ? 
P1 Pd1 P2 C39 78.47(8) . . . . ? 
O5 Pd1 P2 C9 83.2(4) . . . . ? 
O8 Pd1 P2 C9 145.96(9) . . . . ? 
P1 Pd1 P2 C9 -46.83(8) . . . . ? 
O5 Pd1 P2 C31 -31.9(4) . . . . ? 
O8 Pd1 P2 C31 30.86(9) . . . . ? 
P1 Pd1 P2 C31 -161.94(7) . . . . ? 
O6 S1 O5 Pd1 -167.58(13) . . . . ? 
O7 S1 O5 Pd1 -31.2(2) . . . . ? 
C47 S1 O5 Pd1 79.41(16) . . . . ? 
O8 Pd1 O5 S1 -108.51(14) . . . . ? 
P2 Pd1 O5 S1 -45.1(5) . . . . ? 
P1 Pd1 O5 S1 84.71(13) . . . . ? 
O10 S2 O8 Pd1 122.42(12) . . . . ? 
O9 S2 O8 Pd1 -15.04(15) . . . . ? 
C48 S2 O8 Pd1 -126.71(13) . . . . ? 
O5 Pd1 O8 S2 -65.13(12) . . . . ? 
P2 Pd1 O8 S2 121.85(11) . . . . ? 
P1 Pd1 O8 S2 15.2(3) . . . . ? 
C6 C1 C2 C3 -1.0(3) . . . . ? 
C8 C1 C2 C3 179.7(2) . . . . ? 
C6 C1 C2 P1 177.01(16) . . . . ? 
C8 C1 C2 P1 -2.4(3) . . . . ? 
C15 P1 C2 C3 124.11(18) . . . . ? 
C23 P1 C2 C3 8.4(2) . . . . ? 
Pd1 P1 C2 C3 -104.37(17) . . . . ? 
C15 P1 C2 C1 -53.86(18) . . . . ? 
C23 P1 C2 C1 -169.54(16) . . . . ? 
Pd1 P1 C2 C1 77.65(17) . . . . ? 
C1 C2 C3 C4 0.4(3) . . . . ? 
P1 C2 C3 C4 -177.52(18) . . . . ? 
C2 C3 C4 C5 0.1(3) . . . . ? 
C3 C4 C5 O1 -178.7(2) . . . . ? 
C3 C4 C5 C6 0.0(4) . . . . ? 
C7 O1 C5 C4 -172.9(3) . . . . ? 
C7 O1 C5 C6 8.2(3) . . . . ? 
C7 O2 C6 C1 172.3(2) . . . . ? 
C7 O2 C6 C5 -12.2(3) . . . . ? 
C2 C1 C6 O2 176.1(2) . . . . ? 
C8 C1 C6 O2 -4.5(3) . . . . ? 
C2 C1 C6 C5 1.1(3) . . . . ? 
C8 C1 C6 C5 -179.5(2) . . . . ? 
C4 C5 C6 O2 -176.5(2) . . . . ? 
O1 C5 C6 O2 2.5(3) . . . . ? 
C4 C5 C6 C1 -0.6(4) . . . . ? 
O1 C5 C6 C1 178.3(2) . . . . ? 
C6 O2 C7 O1 16.9(3) . . . . ? 
C5 O1 C7 O2 -15.4(3) . . . . ? 
C6 C1 C8 C13 -63.7(3) . . . . ? 
C2 C1 C8 C13 115.7(2) . . . . ? 
C6 C1 C8 C9 117.5(2) . . . . ? 
C2 C1 C8 C9 -63.2(3) . . . . ? 
C13 C8 C9 C10 -0.2(3) . . . . ? 
C1 C8 C9 C10 178.6(2) . . . . ? 
C13 C8 C9 P2 -171.13(16) . . . . ? 
C1 C8 C9 P2 7.7(3) . . . . ? 
C39 P2 C9 C10 140.65(17) . . . . ? 
C31 P2 C9 C10 24.1(2) . . . . ? 
Pd1 P2 C9 C10 -93.44(17) . . . . ? 
C39 P2 C9 C8 -48.3(2) . . . . ? 
C31 P2 C9 C8 -164.79(17) . . . . ? 
Pd1 P2 C9 C8 77.63(18) . . . . ? 
C8 C9 C10 C11 0.0(3) . . . . ? 
P2 C9 C10 C11 171.07(18) . . . . ? 
C9 C10 C11 C12 -0.7(4) . . . . ? 
C10 C11 C12 O3 -179.2(2) . . . . ? 
C10 C11 C12 C13 1.7(4) . . . . ? 
C14 O3 C12 C11 174.2(2) . . . . ? 
C14 O3 C12 C13 -6.7(3) . . . . ? 
C14 O4 C13 C8 -172.1(2) . . . . ? 
C14 O4 C13 C12 6.2(2) . . . . ? 
C9 C8 C13 O4 179.4(2) . . . . ? 
C1 C8 C13 O4 0.4(3) . . . . ? 
C9 C8 C13 C12 1.3(3) . . . . ? 
C1 C8 C13 C12 -177.7(2) . . . . ? 
C11 C12 C13 O4 179.5(2) . . . . ? 
O3 C12 C13 O4 0.3(3) . . . . ? 
C11 C12 C13 C8 -2.1(4) . . . . ? 
O3 C12 C13 C8 178.7(2) . . . . ? 
C13 O4 C14 O3 -10.1(2) . . . . ? 
C12 O3 C14 O4 10.3(2) . . . . ? 
C2 P1 C15 C16 136.85(19) . . . . ? 
C23 P1 C15 C16 -108.49(19) . . . . ? 
Pd1 P1 C15 C16 5.1(2) . . . . ? 
C2 P1 C15 C20 -42.1(2) . . . . ? 
C23 P1 C15 C20 72.5(2) . . . . ? 
Pd1 P1 C15 C20 -173.86(16) . . . . ? 
C20 C15 C16 C17 -2.9(4) . . . . ? 
P1 C15 C16 C17 178.16(19) . . . . ? 
C15 C16 C17 C18 2.2(4) . . . . ? 
C15 C16 C17 C21 -175.1(3) . . . . ? 
C16 C17 C18 C19 0.1(4) . . . . ? 
C21 C17 C18 C19 177.3(3) . . . . ? 
C17 C18 C19 C20 -1.6(4) . . . . ? 
C17 C18 C19 C22 178.1(3) . . . . ? 
C16 C15 C20 C19 1.3(4) . . . . ? 
P1 C15 C20 C19 -179.75(19) . . . . ? 
C18 C19 C20 C15 1.0(4) . . . . ? 
C22 C19 C20 C15 -178.7(3) . . . . ? 
C15 P1 C23 C24 -0.6(2) . . . . ? 
C2 P1 C23 C24 111.71(19) . . . . ? 
Pd1 P1 C23 C24 -124.52(18) . . . . ? 
C15 P1 C23 C28 172.34(17) . . . . ? 
C2 P1 C23 C28 -75.40(19) . . . . ? 
Pd1 P1 C23 C28 48.37(18) . . . . ? 
C28 C23 C24 C25 0.0(4) . . . . ? 
P1 C23 C24 C25 172.7(2) . . . . ? 
C23 C24 C25 C26 -0.1(4) . . . . ? 
C23 C24 C25 C29 -178.8(3) . . . . ? 
C24 C25 C26 C27 -0.1(4) . . . . ? 
C29 C25 C26 C27 178.6(3) . . . . ? 
C25 C26 C27 C28 0.5(4) . . . . ? 
C25 C26 C27 C30 -178.1(2) . . . . ? 
C26 C27 C28 C23 -0.6(3) . . . . ? 
C30 C27 C28 C23 177.9(2) . . . . ? 
C24 C23 C28 C27 0.4(3) . . . . ? 
P1 C23 C28 C27 -172.56(17) . . . . ? 
C39 P2 C31 C32 -28.9(2) . . . . ? 
C9 P2 C31 C32 89.25(19) . . . . ? 
Pd1 P2 C31 C32 -150.64(16) . . . . ? 
C39 P2 C31 C36 156.64(17) . . . . ? 
C9 P2 C31 C36 -85.22(19) . . . . ? 
Pd1 P2 C31 C36 34.89(19) . . . . ? 
C36 C31 C32 C33 0.9(3) . . . . ? 
P2 C31 C32 C33 -173.46(17) . . . . ? 
C31 C32 C33 C34 -0.3(3) . . . . ? 
C31 C32 C33 C37 179.0(2) . . . . ? 
C32 C33 C34 C35 -0.1(4) . . . . ? 
C37 C33 C34 C35 -179.5(2) . . . . ? 
C33 C34 C35 C36 -0.1(4) . . . . ? 
C33 C34 C35 C38 178.7(2) . . . . ? 
C34 C35 C36 C31 0.7(3) . . . . ? 
C38 C35 C36 C31 -178.1(2) . . . . ? 
C32 C31 C36 C35 -1.1(3) . . . . ? 
P2 C31 C36 C35 173.36(17) . . . . ? 
C9 P2 C39 C44 -34.9(2) . . . . ? 
C31 P2 C39 C44 79.2(2) . . . . ? 
Pd1 P2 C39 C44 -161.09(16) . . . . ? 
C9 P2 C39 C40 145.70(17) . . . . ? 
C31 P2 C39 C40 -100.21(18) . . . . ? 
Pd1 P2 C39 C40 19.52(18) . . . . ? 
C44 C39 C40 C41 -0.8(3) . . . . ? 
P2 C39 C40 C41 178.60(17) . . . . ? 
C39 C40 C41 C42 0.9(3) . . . . ? 
C39 C40 C41 C45 -178.8(2) . . . . ? 
C40 C41 C42 C43 -0.7(4) . . . . ? 
C45 C41 C42 C43 179.1(2) . . . . ? 
C41 C42 C43 C44 0.3(4) . . . . ? 
C41 C42 C43 C46 -179.6(2) . . . . ? 
C40 C39 C44 C43 0.4(3) . . . . ? 
P2 C39 C44 C43 -178.98(17) . . . . ? 
C42 C43 C44 C39 -0.1(3) . . . . ? 
C46 C43 C44 C39 179.7(2) . . . . ? 
O6 S1 C47 F2 -57.0(2) . . . . ? 
O7 S1 C47 F2 -179.2(2) . . . . ? 
O5 S1 C47 F2 61.6(2) . . . . ? 
O6 S1 C47 F1 64.0(2) . . . . ? 
O7 S1 C47 F1 -58.2(2) . . . . ? 
O5 S1 C47 F1 -177.44(19) . . . . ? 
O6 S1 C47 F3 -178.06(19) . . . . ? 
O7 S1 C47 F3 59.8(2) . . . . ? 
O5 S1 C47 F3 -59.5(2) . . . . ? 
O10 S2 C48 F5 173.3(2) . . . . ? 
O9 S2 C48 F5 -63.7(3) . . . . ? 
O8 S2 C48 F5 54.9(3) . . . . ? 
O10 S2 C48 F6 52.4(2) . . . . ? 
O9 S2 C48 F6 175.43(19) . . . . ? 
O8 S2 C48 F6 -65.9(2) . . . . ? 
O10 S2 C48 F4 -66.7(2) . . . . ? 
O9 S2 C48 F4 56.3(2) . . . . ? 
O8 S2 C48 F4 174.95(19) . . . . ? 
 
_diffrn_measured_fraction_theta_max    0.998 
_diffrn_reflns_theta_full              30.04 
_diffrn_measured_fraction_theta_full   0.998 
_refine_diff_density_max    0.921 
_refine_diff_density_min   -0.676 
_refine_diff_density_rms    0.070 
